# Supplementary material for: Discovery of Small Molecules that Inhibit the Disordered Protein, p27Kip1
Source: PubMed Central journal article supplement (PMC4623604; doi:10.1038/srep15686), 2015-10-28
Supplement: srep15686-s1.pdf [file srep15686-s1.pdf]

# Discovery of Small Molecules that Inhibit the Disordered Protein, p27<sup>Kip1</sup>

Luigi I. Iconaru<sup>1,2</sup>, David Ban<sup>1</sup>, Kavitha Bharatham<sup>3,4</sup>, Arvind Ramanathan<sup>5</sup>, Weixing Zhang<sup>1</sup>, Anang A. Shelat<sup>3</sup>, Jian Zuo<sup>2#</sup> and Richard W. Kriwacki<sup>1,6#</sup>

<sup>1</sup> Department of Structural Biology; <sup>2</sup> Department of Developmental Neurobiology;

<sup>3</sup> Department of Chemical Biology and Therapeutics, St. Jude Children's Research Hospital, Memphis, TN 38105

<sup>4</sup> Present address: Center for Chemical Biology and Therapeutics, Institute for Stem Cell Biology and Regenerative Medicine, GKVK, Bellary Road, Bangalore 560065, India

<sup>5</sup> Computational Science and Engineering Division, Health Data Sciences Institute, Oak Ridge National Laboratory, Oak Ridge, TN 37830

<sup>6</sup> Department of Microbiology, Immunology and Biochemistry, The University of Tennessee Health Science Center, Memphis, TN 38163

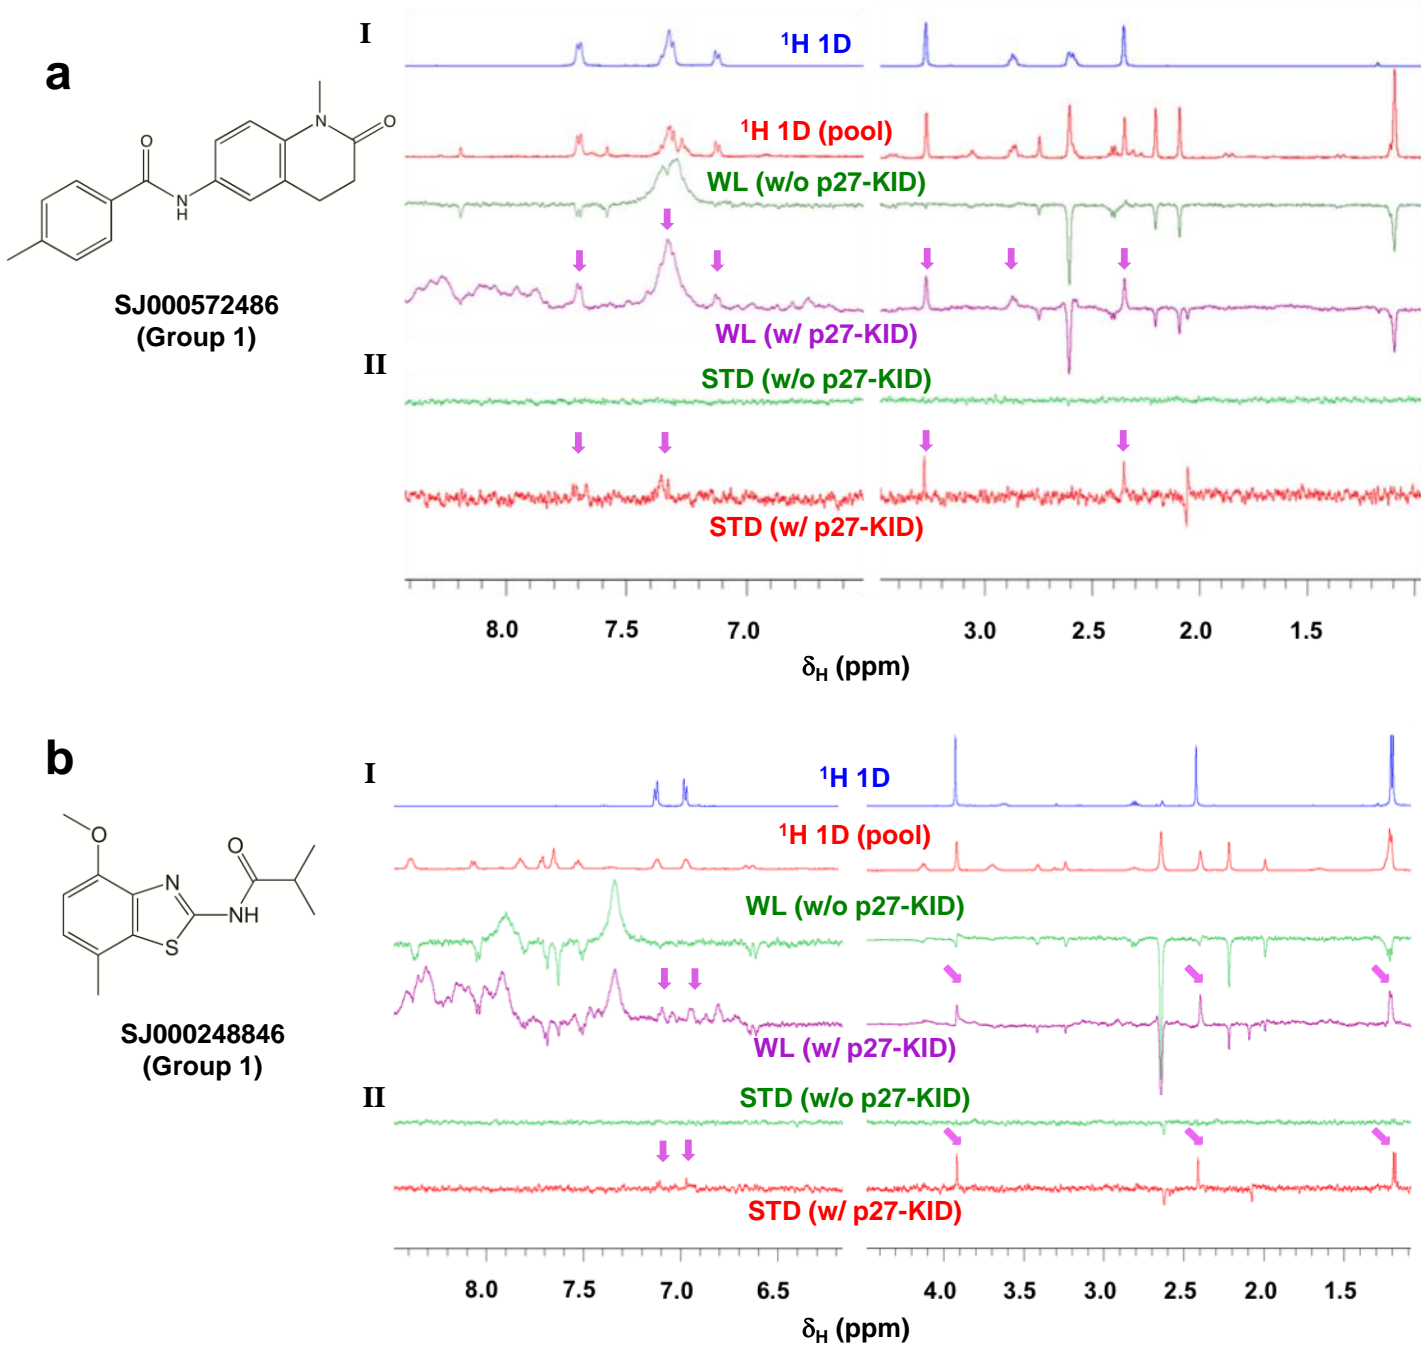

**Supplementary Figure 1.** Representative 1D NMR results showing that small molecules bind to p27-KID. **(a, b)** Representative 1D NMR results for two Group 1 molecules binding to p27-KID. 1D  $^1\text{H}$  spectra are shown for the “hit” molecules and for the pool of five compounds (pool) in which they were originally screened. Also illustrated are WaterLOGSY (WL) and saturation transfer difference (STD) spectra for the compounds in the presence (w/) and absence (w/o) of p27-KID. The chemical structures of the two compounds are illustrated at the left.

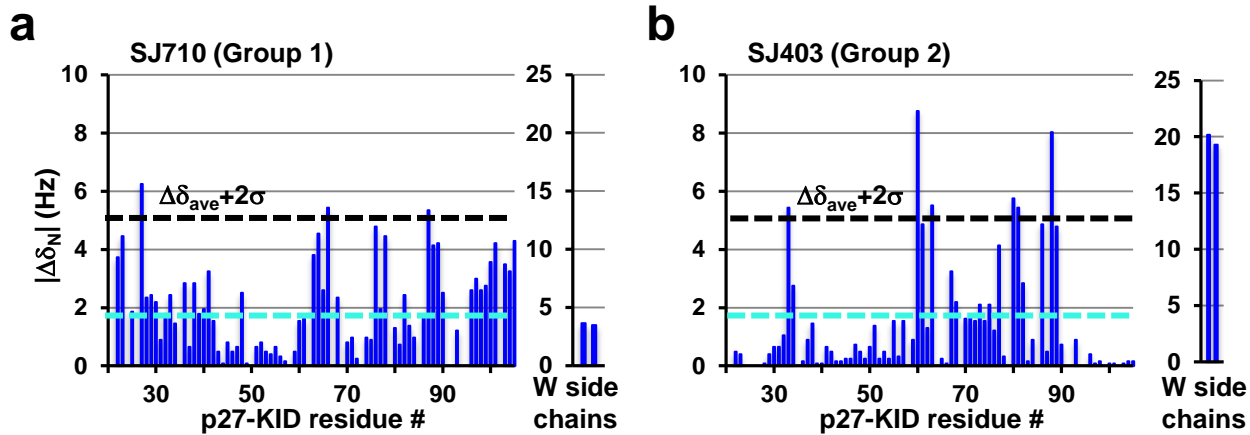

**Supplementary Figure 2.** Individual  $^{15}\text{N}$  ( $\Delta\delta_N$ ) chemical shift perturbations obtained through analysis of 2D  $^1\text{H}$ - $^{15}\text{N}$  “in-phase” HSQC NMR titrations of SJ710 (**b**, Group 1) and SJ403 (**c**, Group 2), respectively, into  $^{15}\text{N}$ -p27-KID (100  $\mu\text{M}$ ).

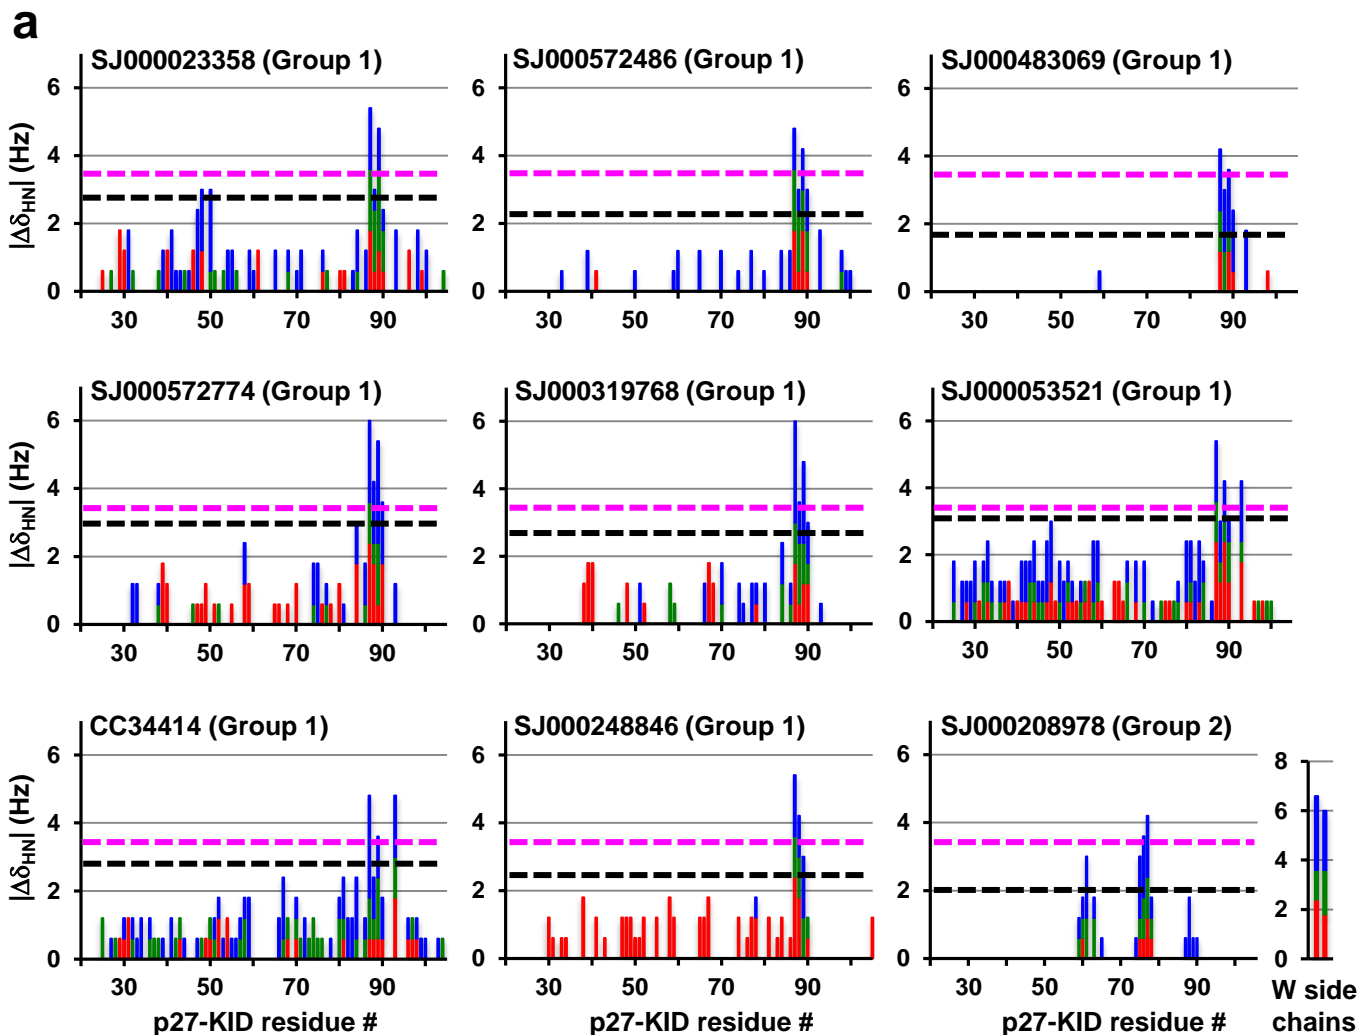

**Supplementary Figure 3.** Results of 2D  $^1\text{H}$ - $^{15}\text{N}$  HSQC analysis of all small molecules that exhibited binding to  $^{15}\text{N}$ -p27-KID. Individual  $^1\text{H}$  chemical shift perturbation histograms are shown for the molecules identified as “hits” in the initial fragment library screen (a), in the follow-up screen of chemically similar compounds in the same libraries (b), and from the in-house high-throughput screening library identified on the basis of the field alignment models (c). The threshold for identifying specific interactions with p27-KID residues was defined as two standard deviations above the average the perturbation values (represented by a dotted black line in each graph). The experimental spectral resolution in the  $^1\text{H}$  dimension (3.5 Hz) is represented by the dotted magenta line. The molar ratios of  $^{15}\text{N}$ -p27-KID (100  $\mu\text{M}$ ) to inhibitor used for titrations were 1:2.5 (red), 1:5 (green), and 1:10 (blue).

**b**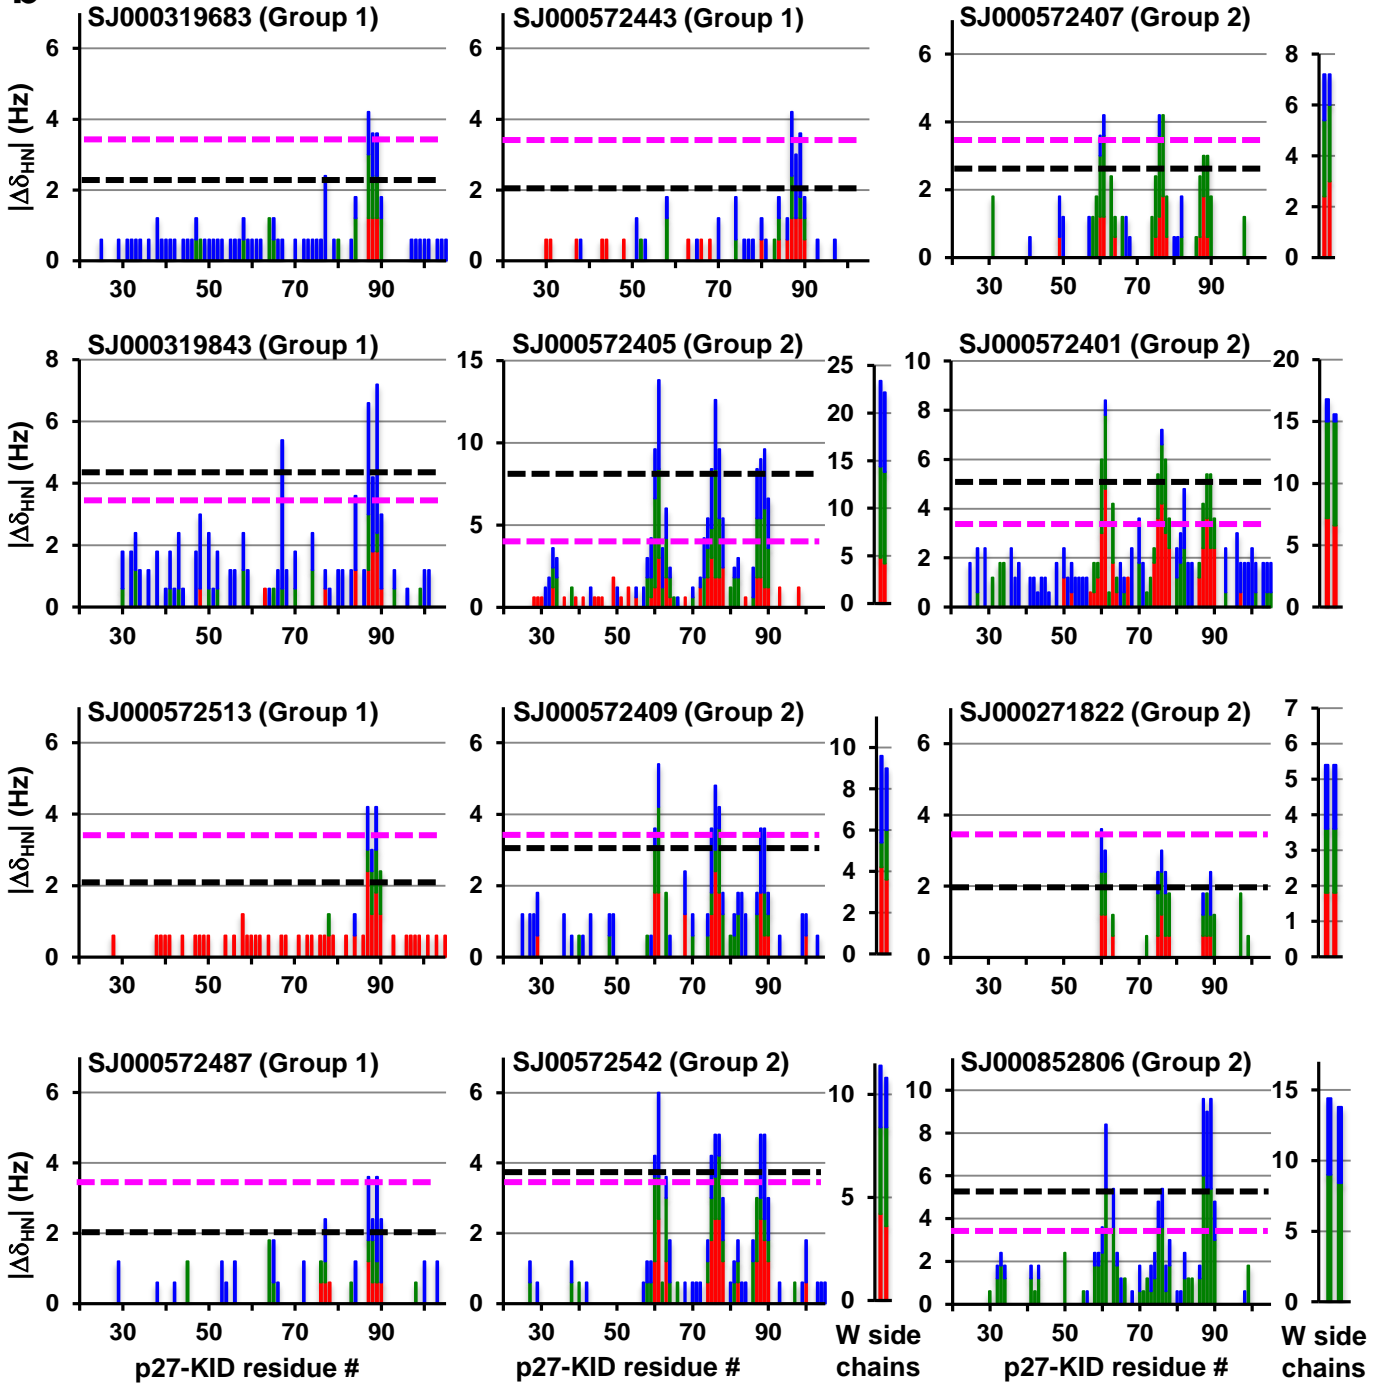**Supplementary Figure 3 (continued)**

**C**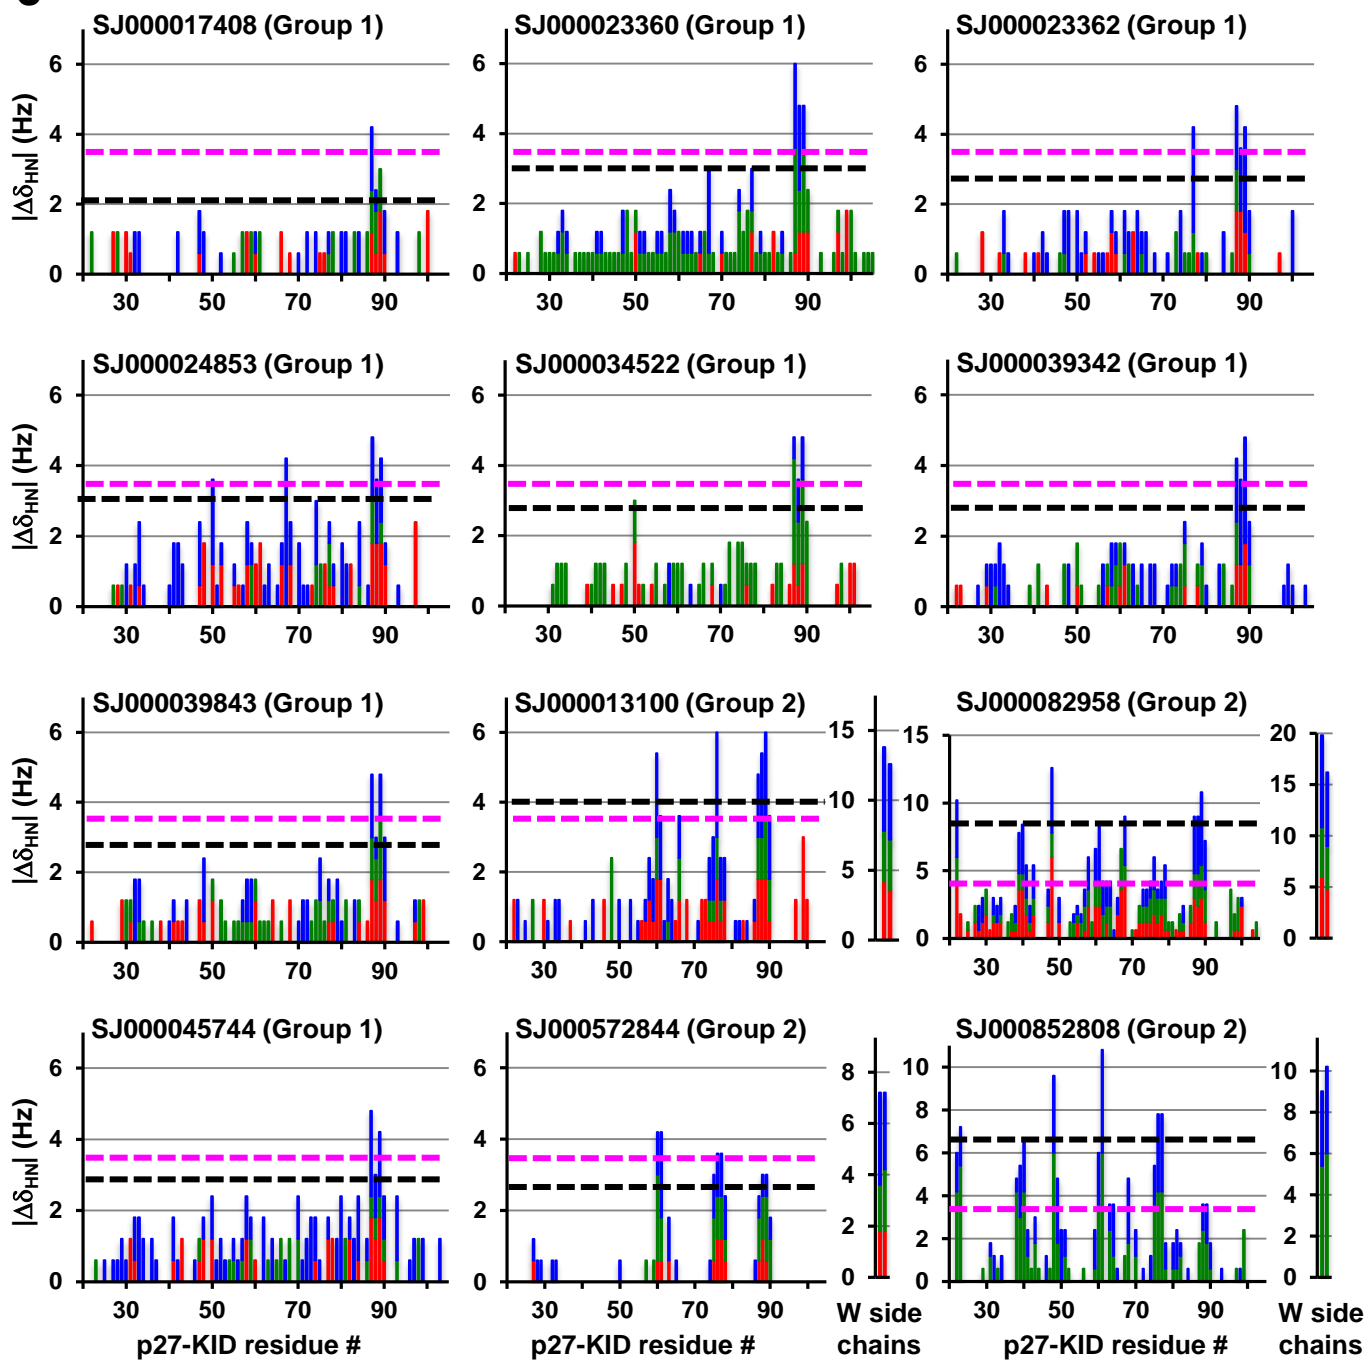**Supplementary Figure 3 (continued)**

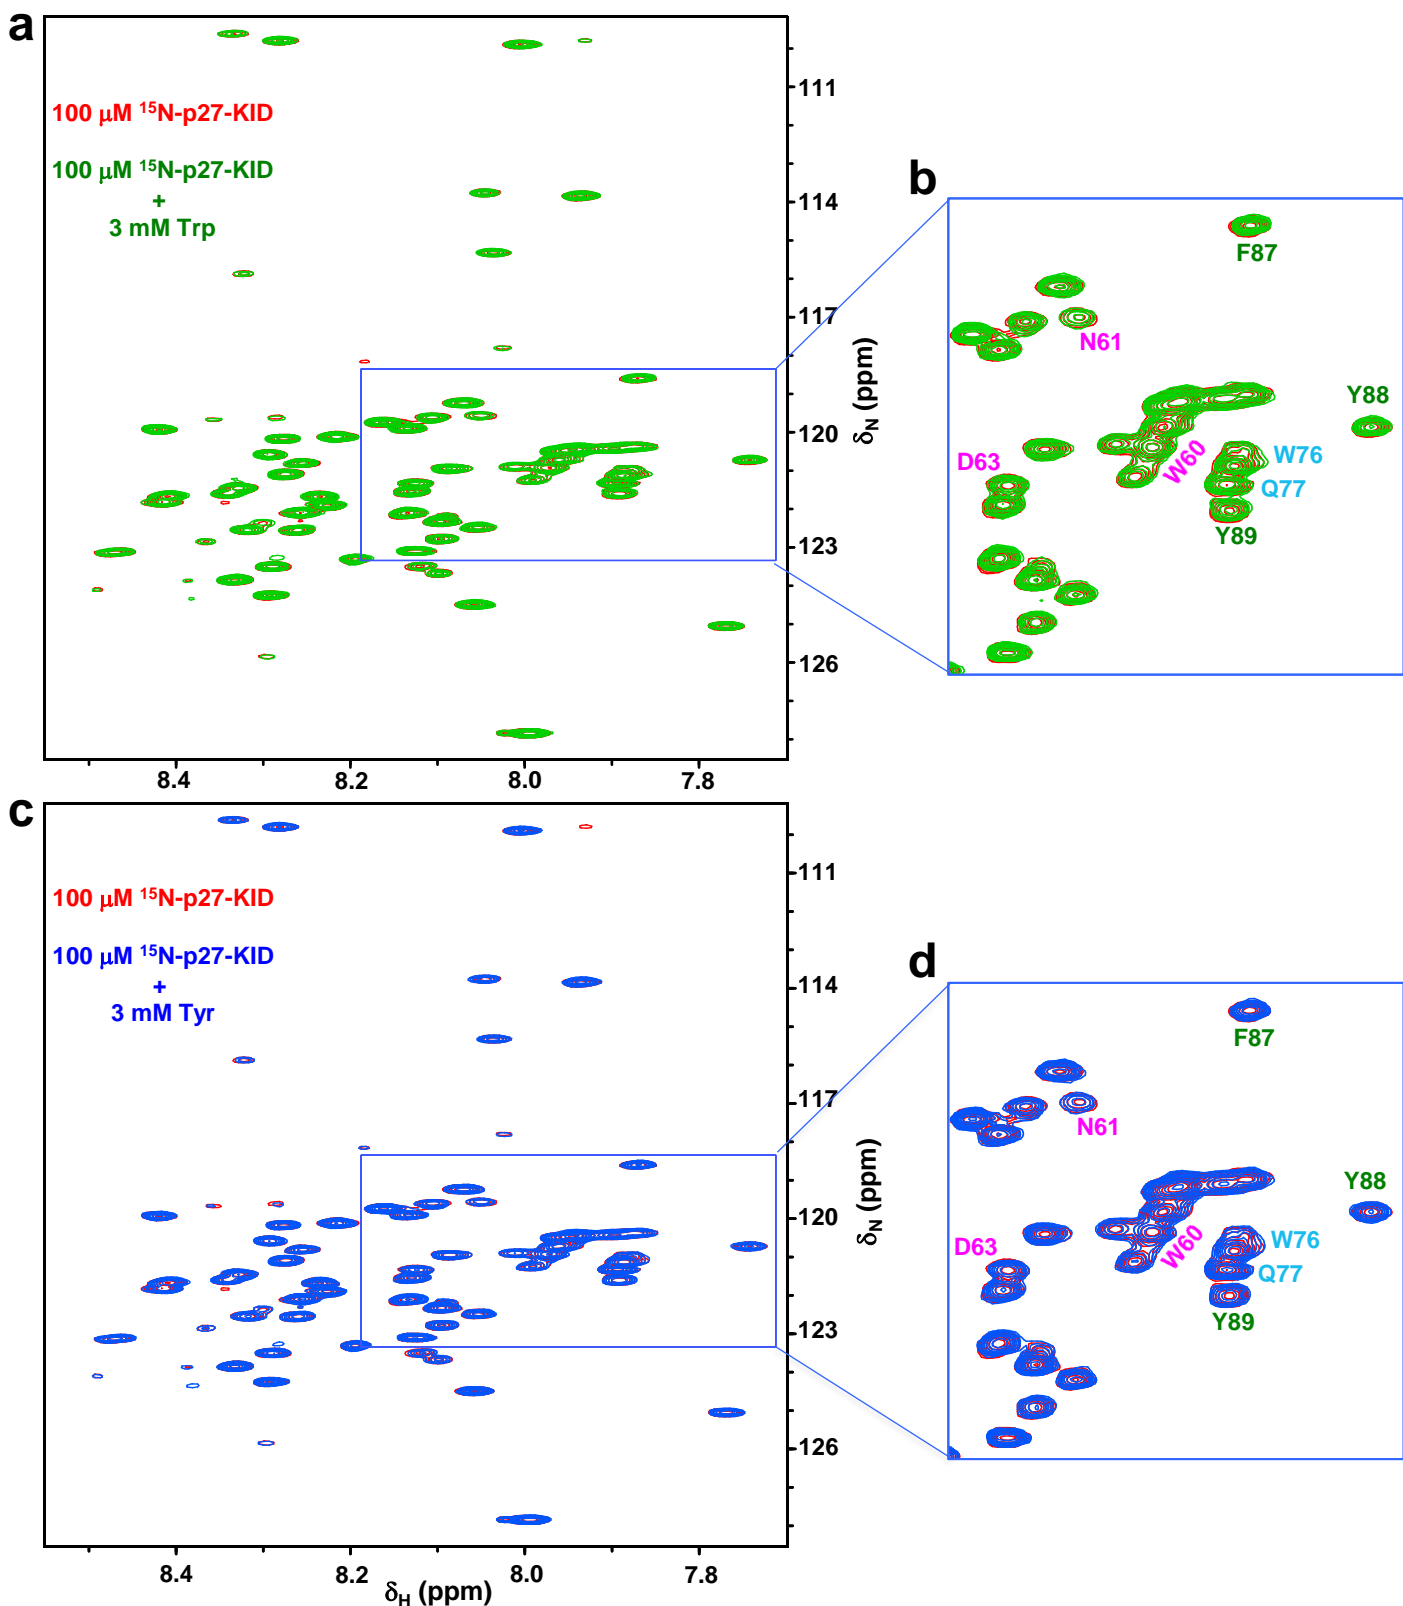

**Supplementary Figure 4.** Amino acids with aromatic side chains do not bind specifically to p27. (a, c) Overlaid 2D  $^1\text{H}$ - $^{15}\text{N}$  HSQC NMR spectra of  $^{15}\text{N}$ -p27-KID (100  $\mu\text{M}$ ) in the absence (red) and presence of (a) tryptophan (3 mM, green) and (c) tyrosine (3 mM, blue). (b, d) Expanded regions (represented by the blue boxes) including a subset of the p27-KID residues involved in interaction with fragment hits (highlighted in Fig. 2b, e) show no perturbations after addition of tryptophan (b) and tyrosine (d), respectively.

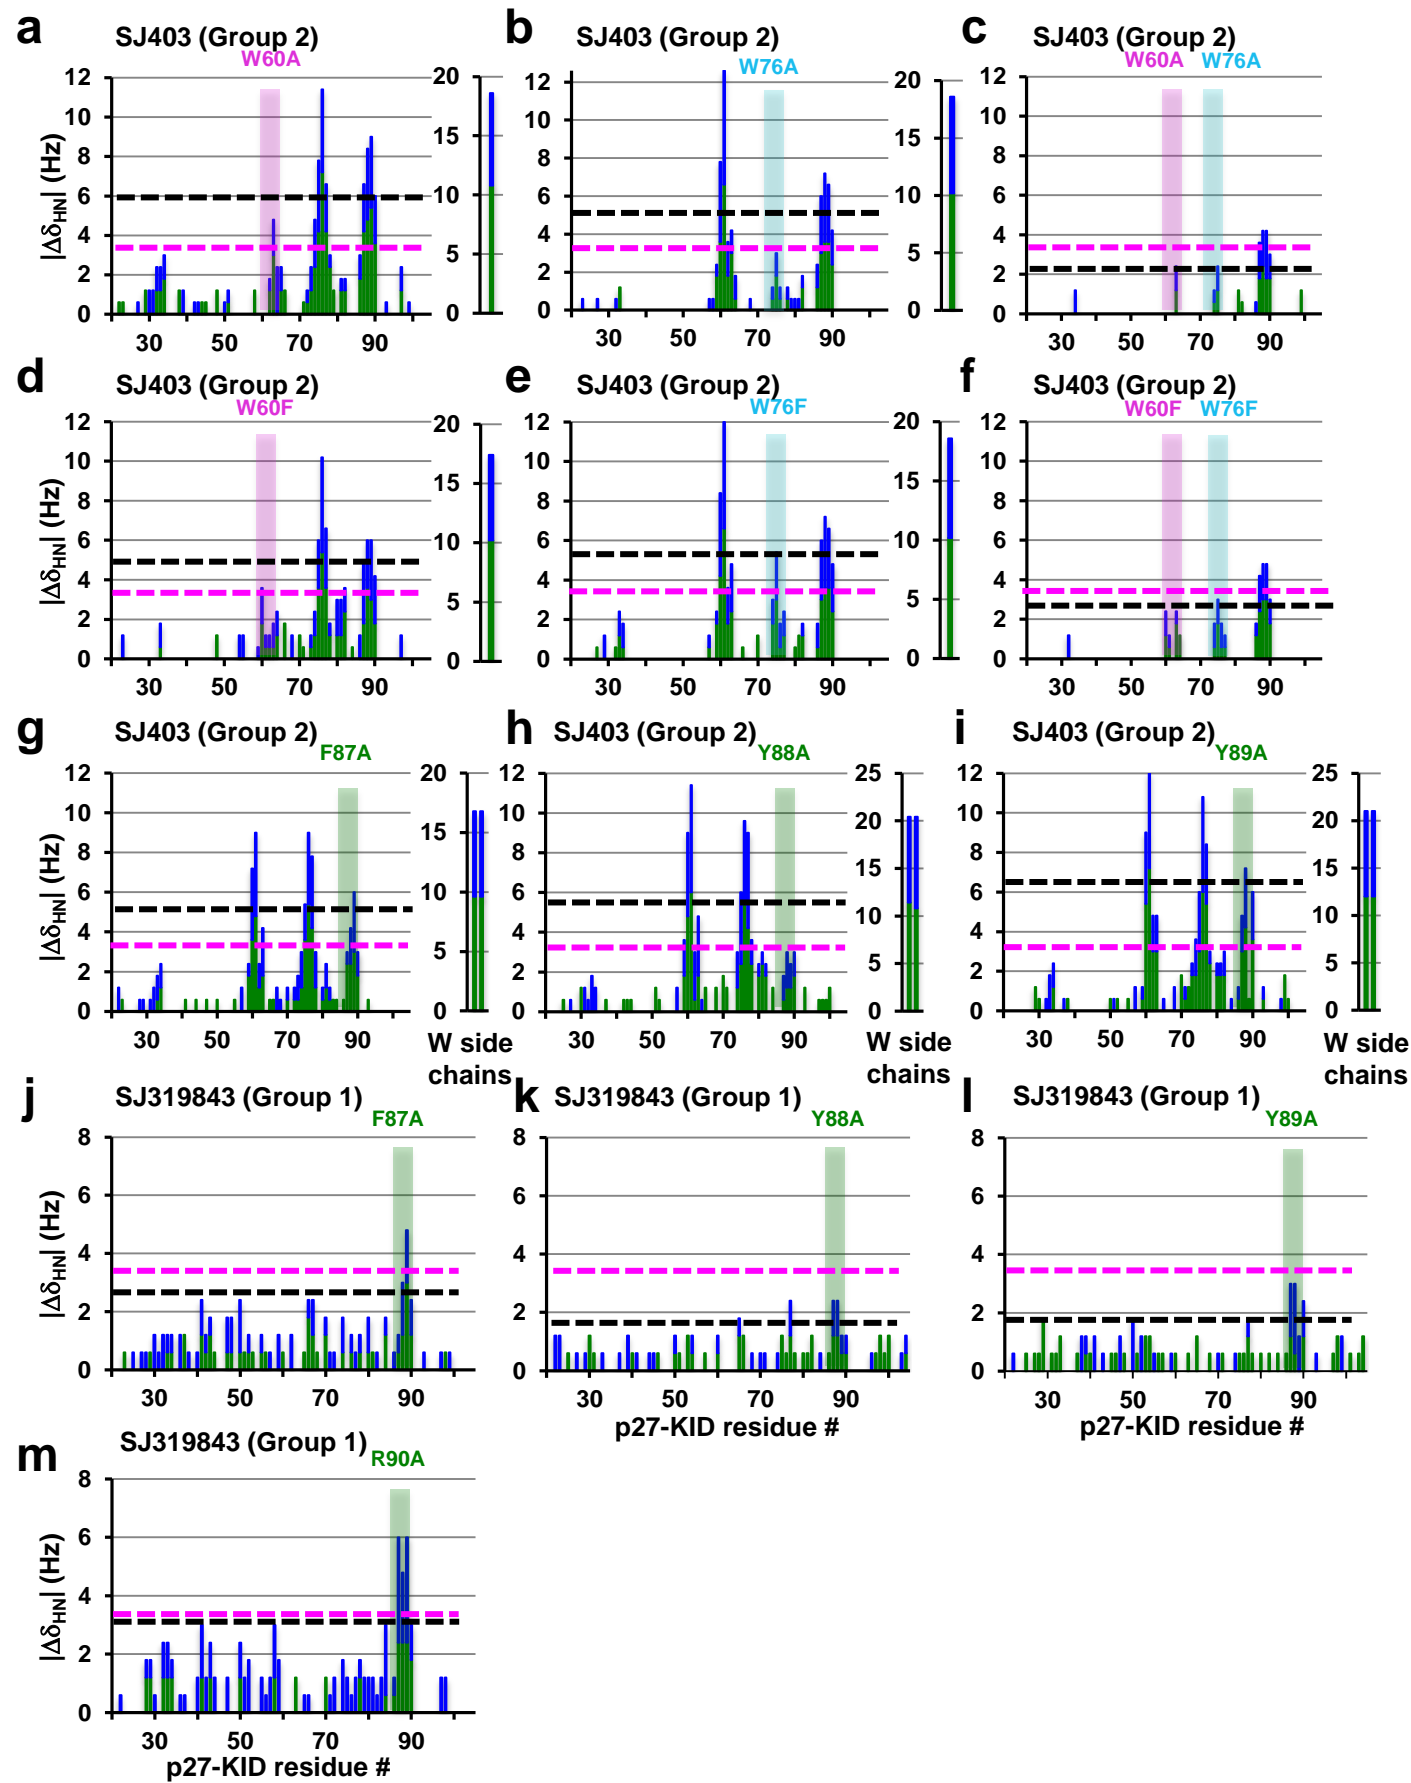



**Supplementary Figure 5.** Results of 2D NMR analysis of mutant forms of p27-KID to determine the contributions of tryptophan and tyrosine residues to interactions with small molecules. Histograms of  $^1\text{H}$  chemical shift perturbations observed in 2D  $^1\text{H}$ - $^{15}\text{N}$  HSQC spectra with increasing concentrations of SJ403 for, (a)  $^{15}\text{N}$ -p27-KID- $\text{W}_{60}\text{A}$ , (b)  $^{15}\text{N}$ -p27-KID- $\text{W}_{76}\text{A}$ , (c)  $^{15}\text{N}$ -p27-KID- $\text{W}_{60}\text{A}$ - $\text{W}_{76}\text{A}$ , (d)  $^{15}\text{N}$ -p27-KID- $\text{W}_{60}\text{F}$ , (e)  $^{15}\text{N}$ -p27-KID- $\text{W}_{76}\text{F}$ , (f)  $^{15}\text{N}$ -p27-KID- $\text{W}_{60}\text{F}$ - $\text{W}_{76}\text{F}$ , (g)  $^{15}\text{N}$ -p27-KID- $\text{F}_{87}\text{A}$ , (h)  $^{15}\text{N}$ -p27-KID- $\text{Y}_{88}\text{A}$ , (i)  $^{15}\text{N}$ -p27-KID- $\text{Y}_{89}\text{A}$ ; and of SJ319843 for (j)  $^{15}\text{N}$ -p27-KID- $\text{F}_{87}\text{A}$ , (k)  $^{15}\text{N}$ -p27-KID- $\text{Y}_{88}\text{A}$ , (l)  $^{15}\text{N}$ -p27-KID- $\text{Y}_{89}\text{A}$ , and (m)  $^{15}\text{N}$ -p27-KID- $\text{R}_{90}\text{A}$ . Ratios of  $^{15}\text{N}$ -p27-KID to small molecules of 1:5 (green) and 1:10 (blue) were used.

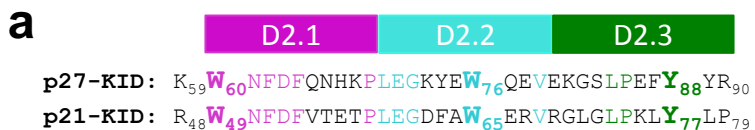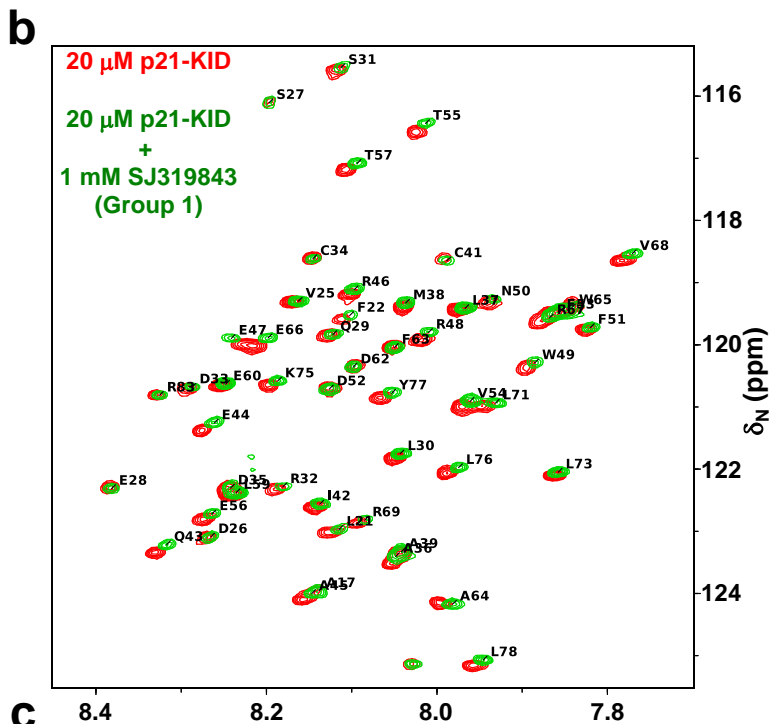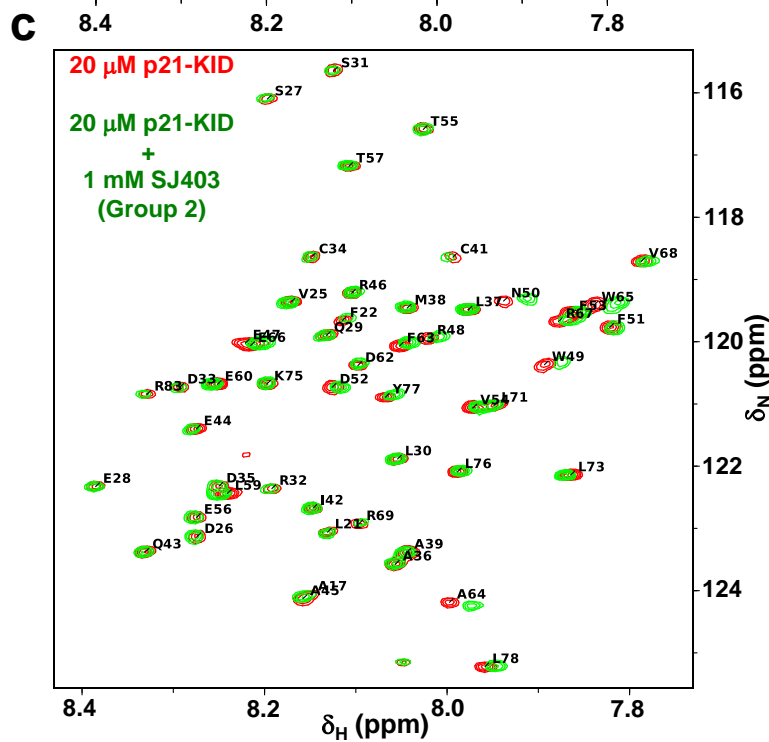

**Supplementary Figure 6.** (a) Comparison of amino acid sequences of the D2 subdomains of p27-KID and p21-KID; (b, c) Overlaid 2D  $^1\text{H}$ - $^{15}\text{N}$  HSQC NMR spectra of  $^2\text{H}/^{15}\text{N}$ -p21-KID (20  $\mu\text{M}$ ) in the absence (red) and presence (green) of 1 mM SJ319843 (b, Group 1) and 1 mM SJ403 (c, Group 2), respectively; glycine region was omitted for improved clarity.

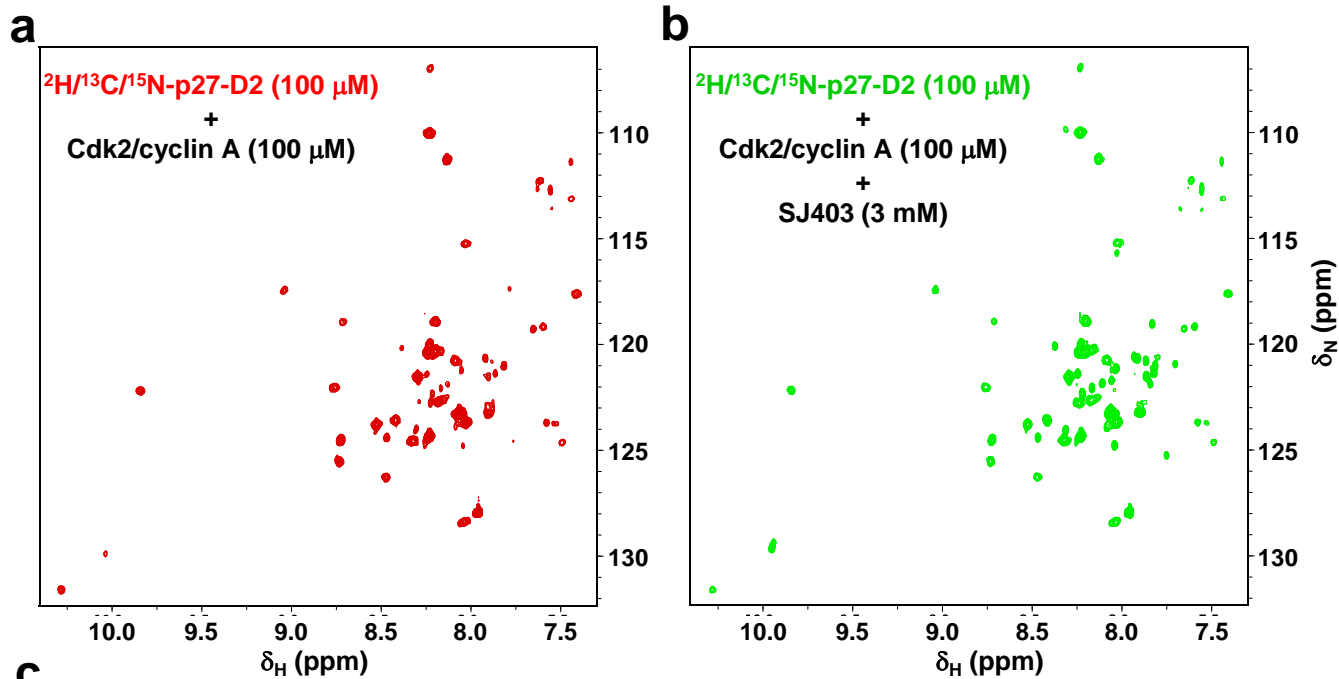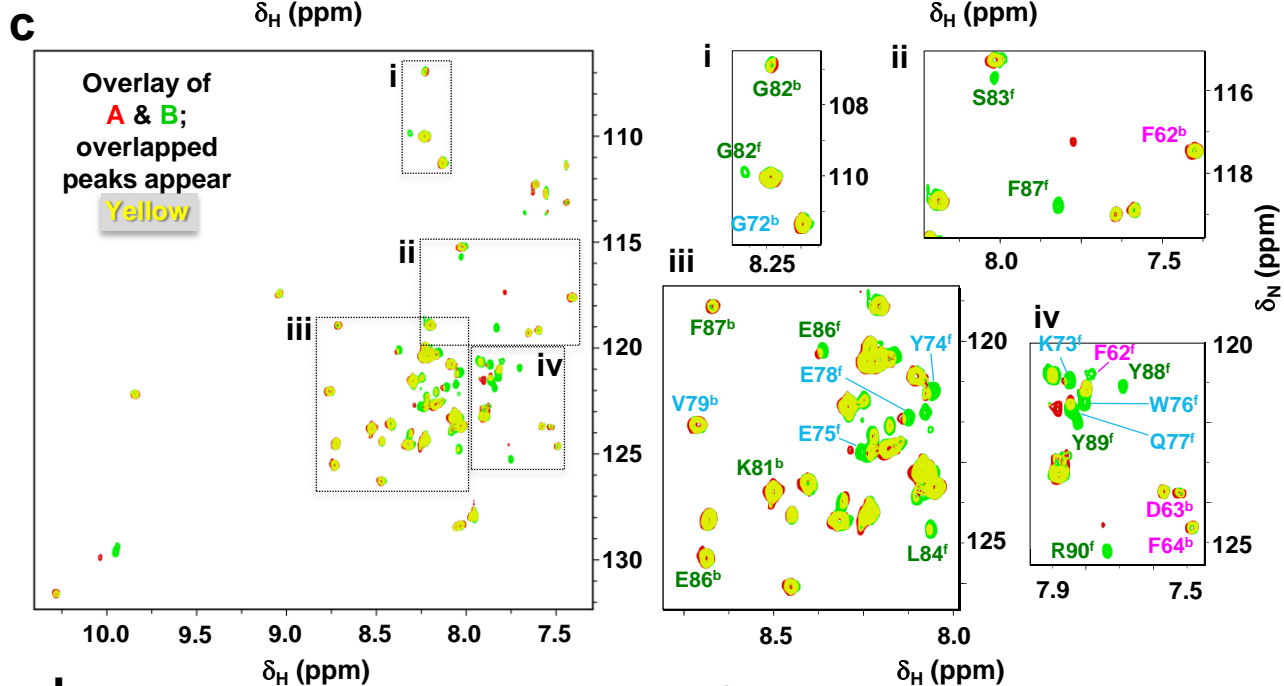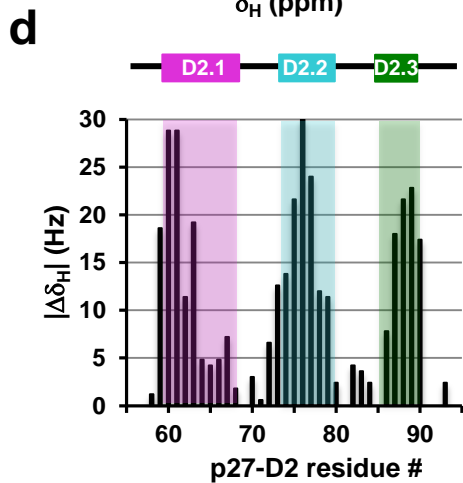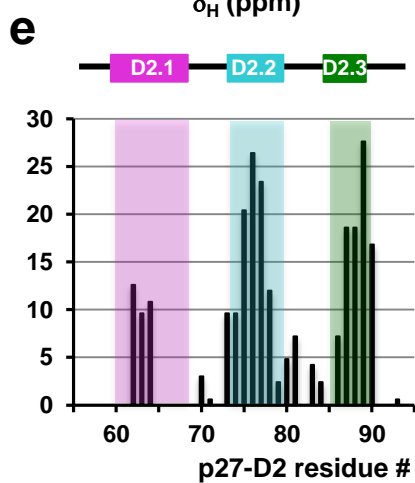

**Supplementary Figure 7.** 2D NMR analysis of the displacement of  $^2\text{H}/^{13}\text{C}/^{15}\text{N}$ -p27-D2 from Cdk2/cyclin A by SJ403. 2D  $^1\text{H}$ - $^{15}\text{N}$  TROSY-HSQC spectra of  $^2\text{H}/^{13}\text{C}/^{15}\text{N}$ -p27-D2/Cdk2/cyclin A in the absence (a) and presence of 3 mM SJ403 (b). In (c), the spectra in (a) and (b) are overlaid to emphasize resonance perturbations associated with the binding of SJ403 to p27-D2. Unperturbed resonances appear in yellow color. Examples of resonances of p27-D2 bound to Cdk2/cyclin A that decreased in intensity upon interaction with SJ403 are labeled with a superscripted “b”. Examples of resonances corresponding to free p27-D2 that increased in intensity in the presence of SJ403 are marked by a superscripted “f”. (d, e) Chemical shift perturbations observed for resonances of isolated  $^{15}\text{N}$ -p27-D2 in the presence of 3 mM SJ403 (d) and for the population of free p27-D2 observed for the sample containing  $^2\text{H}/^{13}\text{C}/^{15}\text{N}$ -p27-D2, Cdk2/cyclin A, and 3 mM SJ403. The locations of sub-domains within p27-D2 are indicated by the shaded boxes.

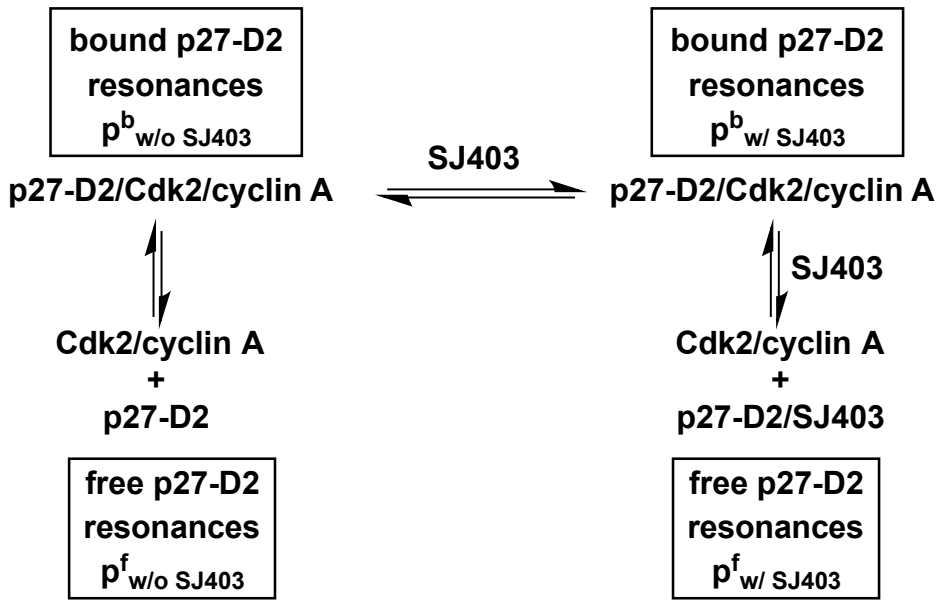

**Supplementary Figure 8.** Graphic representation of the displacement of p27-D2 by SJ403. The initial equilibrium is perturbed by the addition of SJ403, resulting in increased population of free p27-D2, which is bound to the small molecule, SJ403.

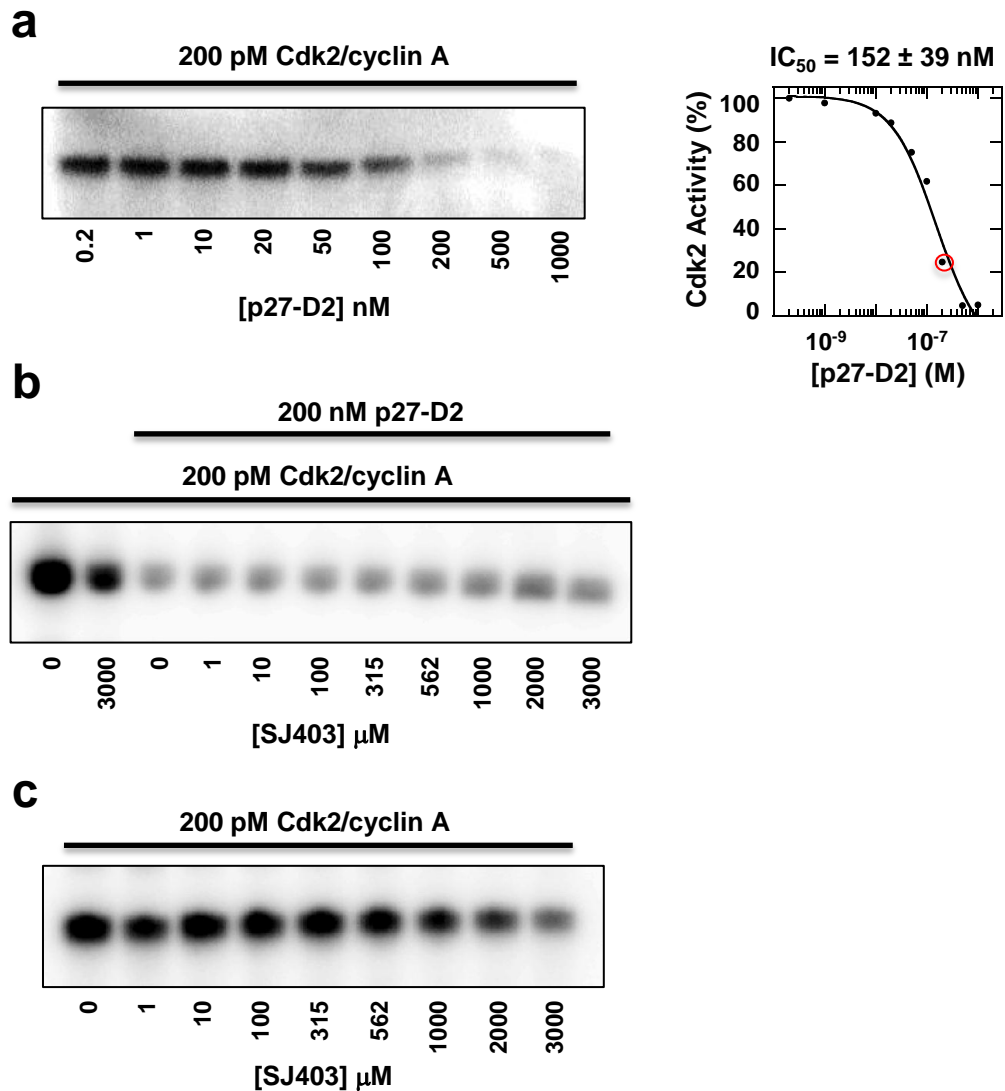

**Supplementary Figure 9.** Results of Cdk2 activity assays for Cdk2/cyclin A (200 pM) in the presence of (a) increasing concentrations of p27-D2, (b) p27-D2 (200 nM) and increasing concentrations of SJ403, and (c) increasing concentrations of SJ403. The panels show phosphoimager results after SDS-PAGE analysis of <sup>32</sup>P incorporation from ATP into the substrate, Histone H1. A single set of representative results are shown; all experiments were performed in triplicate.

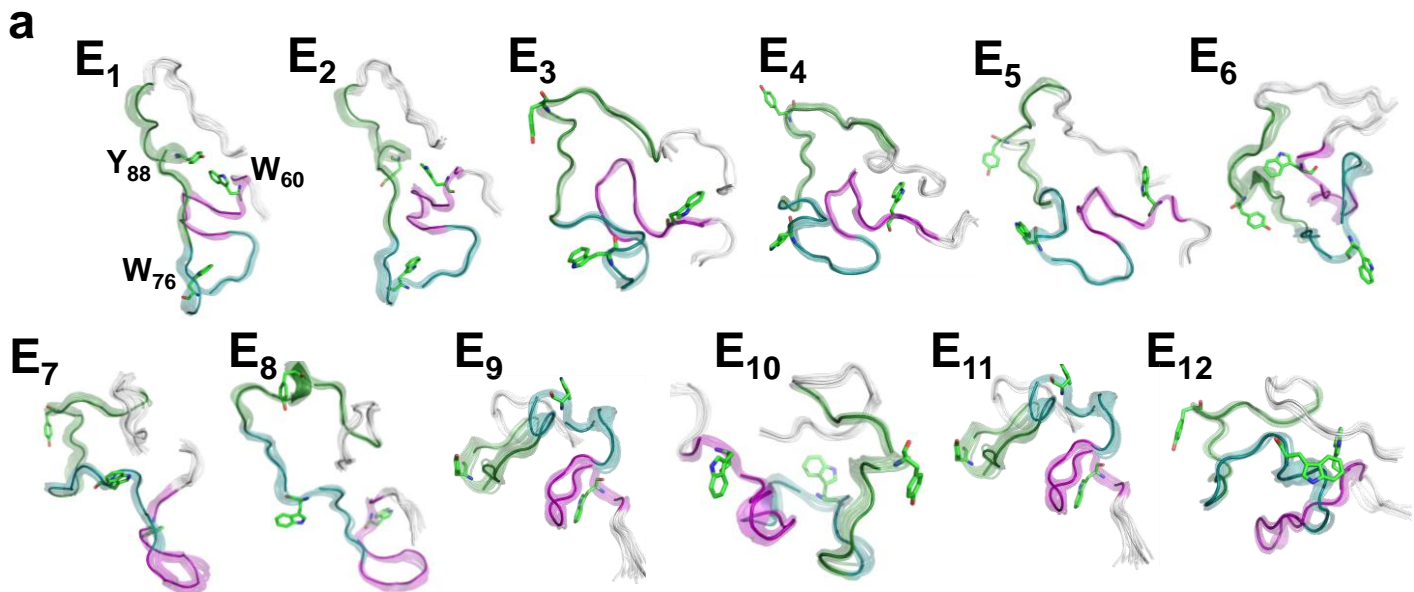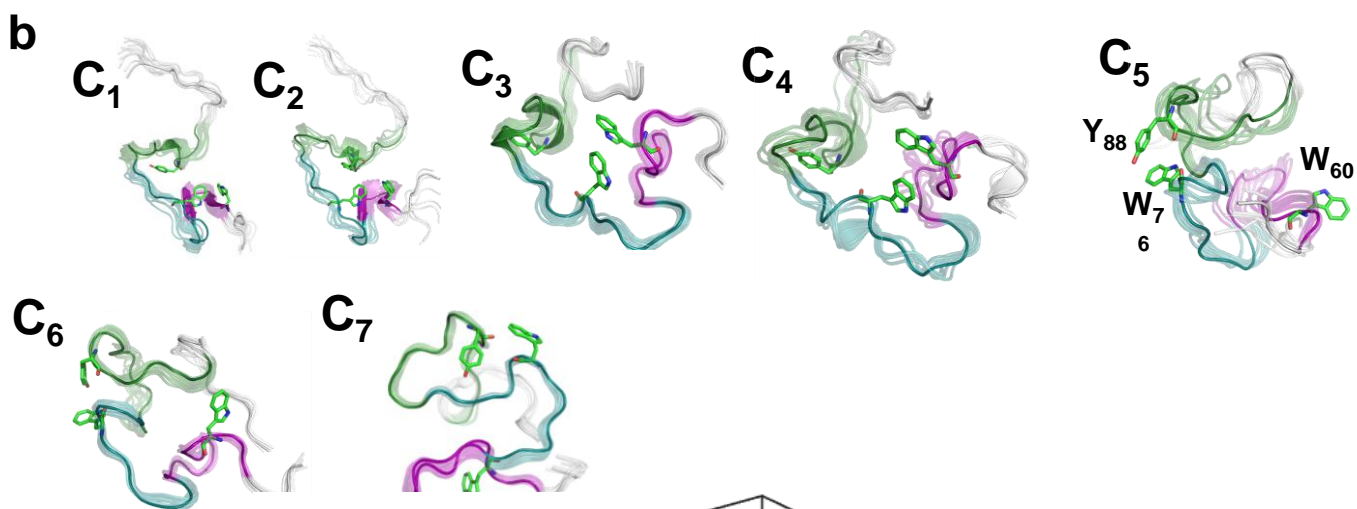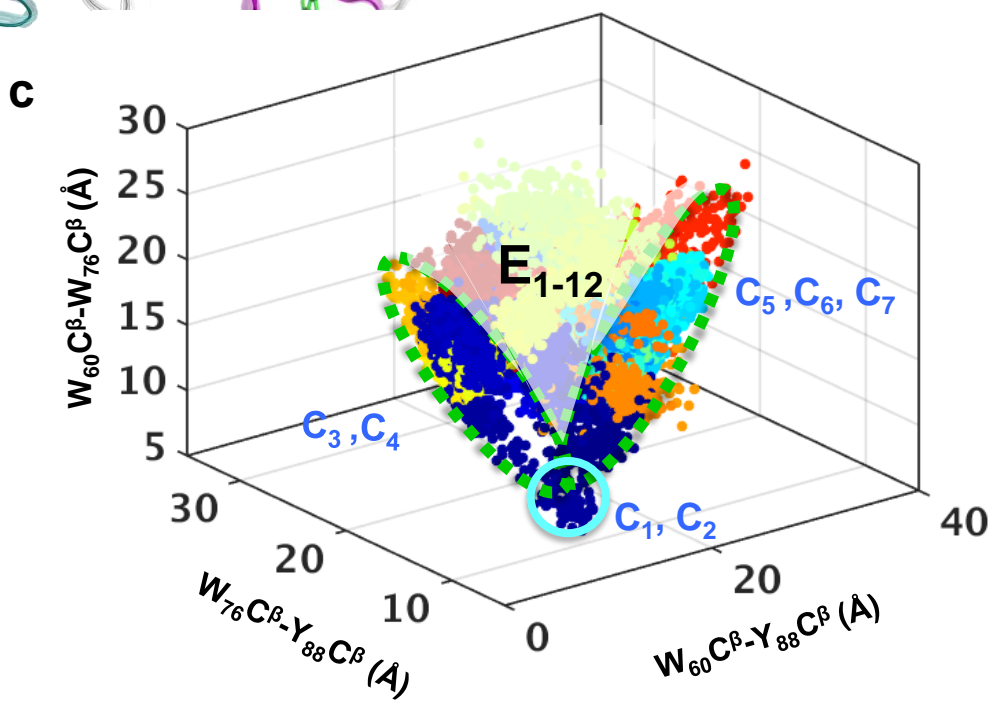

**Supplementary Figure 10.** Compact (**C**; panels **a**) and Extended (**E**; panel **b**) conformations from the p27-D2 MD simulation partitioned using both the time-series information and distance distributions from Fig. 9. The times at which these representative structures were selected are indicated in Fig. 9a. The atoms of  $W_{60}$ ,  $W_{76}$  and  $Y_{88}$  are illustrated as sticks in each structure. The blurring represents the conformations of molecules within 0.1 ns before and after the sampled time in the trajectory. Panel (**c**) summarizes the distribution of conformers along the distances between  $W_{60}$ - $W_{76}$  C $\beta$ ,  $W_{60}$ - $Y_{88}$  C $\beta$  and  $W_{76}$ - $Y_{88}$  C $\beta$  atoms. Each conformer is colored according to its timestamp from the simulation, with the color drawn uniformly from fifty bins between 0 (blue) microseconds and 0.4 (red) microseconds. The conformers from the respective compact (**C**) states are shown as three ellipses. The first ellipse (light blue color) represents conformers from **C1** and **C2**, where the distance between  $W_{60}$ - $Y_{88}$  C $\beta$  and  $W_{76}$ - $Y_{88}$  C $\beta$  atoms were small. The conformers from **C3-7** (marked by green ellipses) are shown in regions where either the  $W_{60}$ - $Y_{88}$  C $\beta$  distance was small (and the  $W_{76}$ - $Y_{88}$  C $\beta$  distance was large) or vice-versa. The extended (**E**) conformers are highlighted in **E1-E12**, which were taken from other regions of the simulation (Fig. 9a).



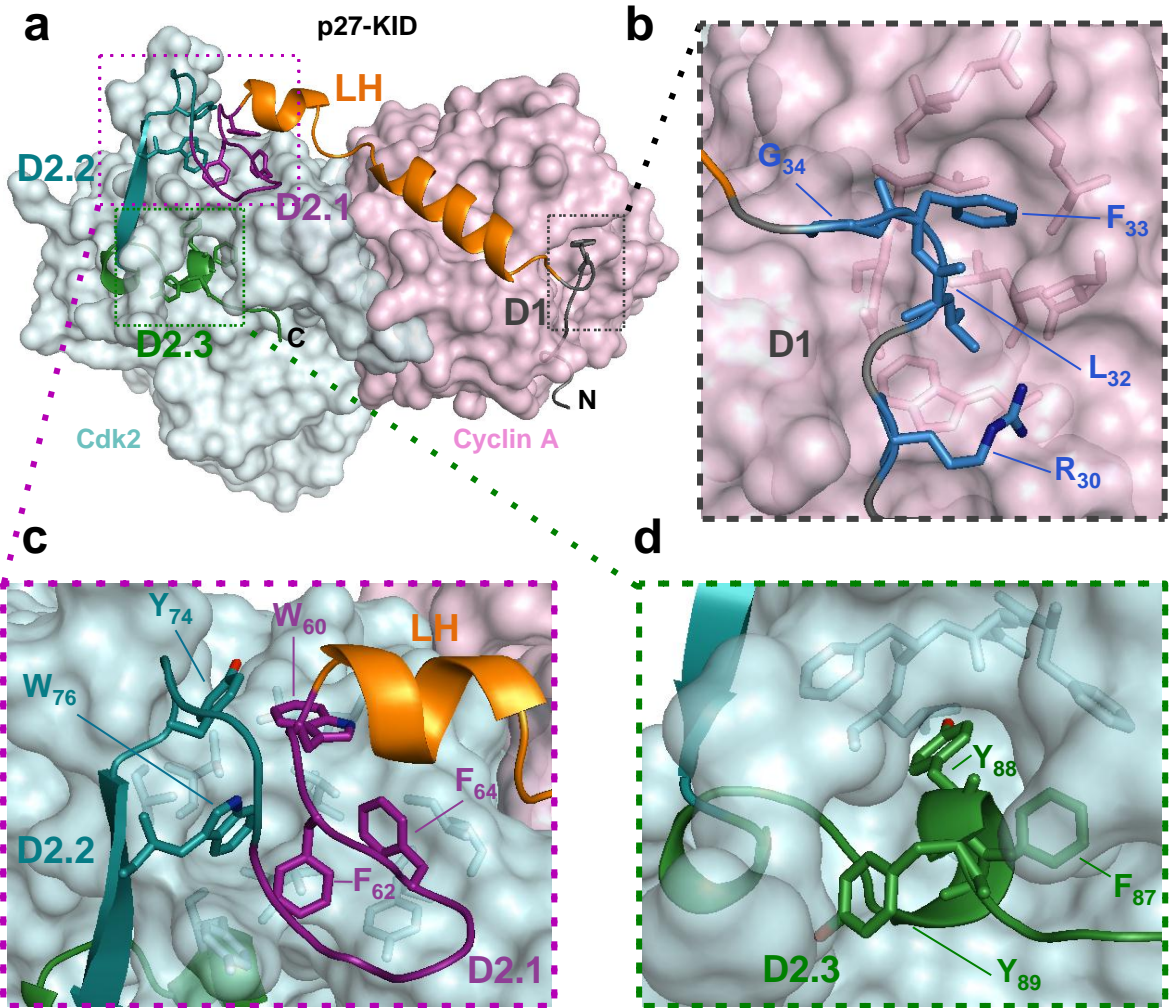

**Supplementary Figure 11.** Illustration of the structure of aromatic residues within sub-domain D2 and key binding residues with sub-domain D1 of p27 from the p27-KID/Cdk2/cyclin A structure. **(a)** View of entire structure. **(b–d)** Expanded views of sub-domain D1 binding to cyclin A **(b)** and of the binding of sub-region D2.1-D2.2 **(c)** and D2.3 **(d)** to Cdk2.

**a** Compounds from Maybridge Ro3 library  
Compounds from In-house library

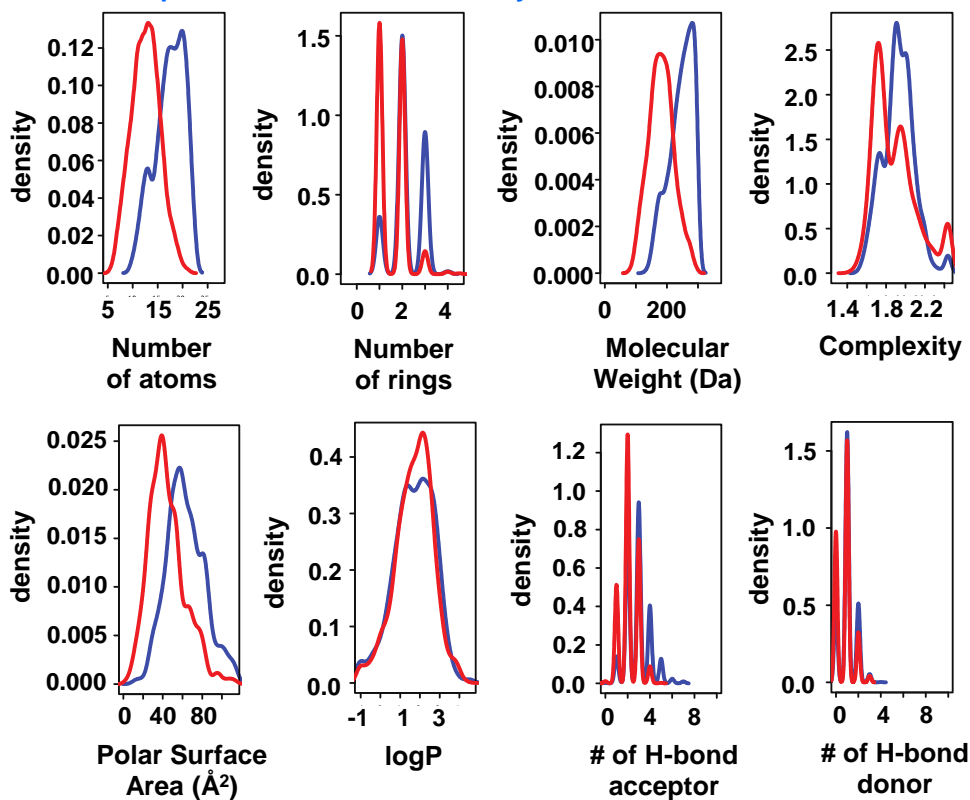

**b**  
p27-KID

GS<sub>22</sub>H<sub>2</sub>M-E<sub>22</sub>HPKPSACRNLF<sub>22</sub>GPVDHEELTRDLEKHC<sub>22</sub>R<sub>22</sub>D<sub>22</sub>M<sub>22</sub>E  
EAS<sub>22</sub>Q<sub>22</sub>R<sub>22</sub>K<sub>22</sub>W<sub>22</sub>N<sub>22</sub>F<sub>22</sub>D<sub>22</sub>F<sub>22</sub>Q<sub>22</sub>N<sub>22</sub>H<sub>22</sub>K<sub>22</sub>P<sub>22</sub>L<sub>22</sub>E<sub>22</sub>G<sub>22</sub>Y<sub>22</sub>E<sub>22</sub>W<sub>22</sub>Q<sub>22</sub>E<sub>22</sub>V<sub>22</sub>E<sub>22</sub>K<sub>22</sub>G<sub>22</sub>S<sub>22</sub>L<sub>22</sub>P<sub>22</sub>E  
F<sub>22</sub>Y<sub>22</sub>R<sub>22</sub>P<sub>22</sub>P<sub>22</sub>R<sub>22</sub>P<sub>22</sub>P<sub>22</sub>K<sub>22</sub>G<sub>22</sub>A<sub>22</sub>C<sub>22</sub>K<sub>22</sub>V<sub>22</sub>P<sub>22</sub>A<sub>22</sub>Q<sub>22</sub>E<sub>22</sub><sub>105</sub>

**d**  
p27-D2

GS<sub>58</sub>H<sub>58</sub>M-R<sub>58</sub>K<sub>58</sub>W<sub>58</sub>N<sub>58</sub>F<sub>58</sub>D<sub>58</sub>F<sub>58</sub>Q<sub>58</sub>N<sub>58</sub>H<sub>58</sub>K<sub>58</sub>P<sub>58</sub>L<sub>58</sub>E<sub>58</sub>G<sub>58</sub>Y<sub>58</sub>E<sub>58</sub>W<sub>58</sub>Q<sub>58</sub>E<sub>58</sub>V<sub>58</sub>E<sub>58</sub>K<sub>58</sub>G<sub>58</sub>S<sub>58</sub>L<sub>58</sub>P<sub>58</sub>E  
F<sub>58</sub>Y<sub>58</sub>R<sub>58</sub>P<sub>58</sub>P<sub>58</sub>R<sub>58</sub>P<sub>58</sub>P<sub>58</sub>K<sub>58</sub>G<sub>58</sub>A<sub>58</sub>C<sub>58</sub>K<sub>58</sub>V<sub>58</sub>P<sub>58</sub>A<sub>58</sub>Q<sub>58</sub>E<sub>58</sub><sub>105</sub>

**c**

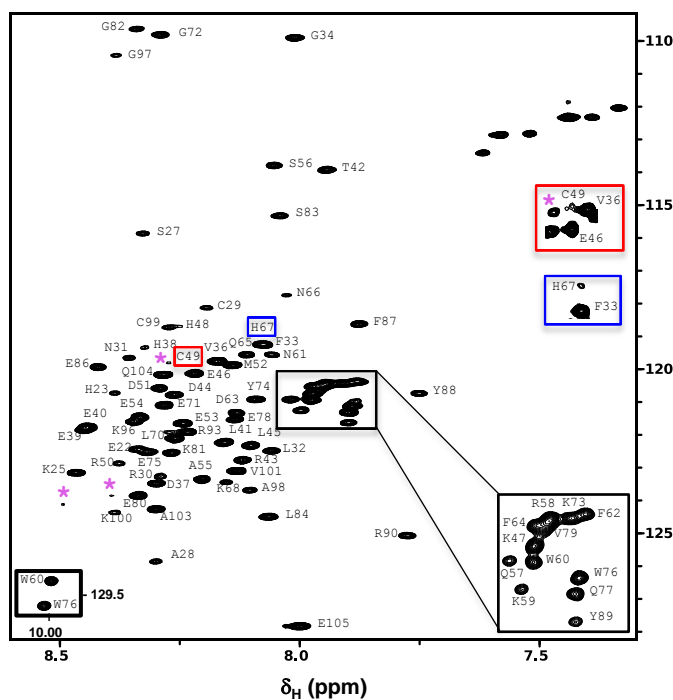

**e**

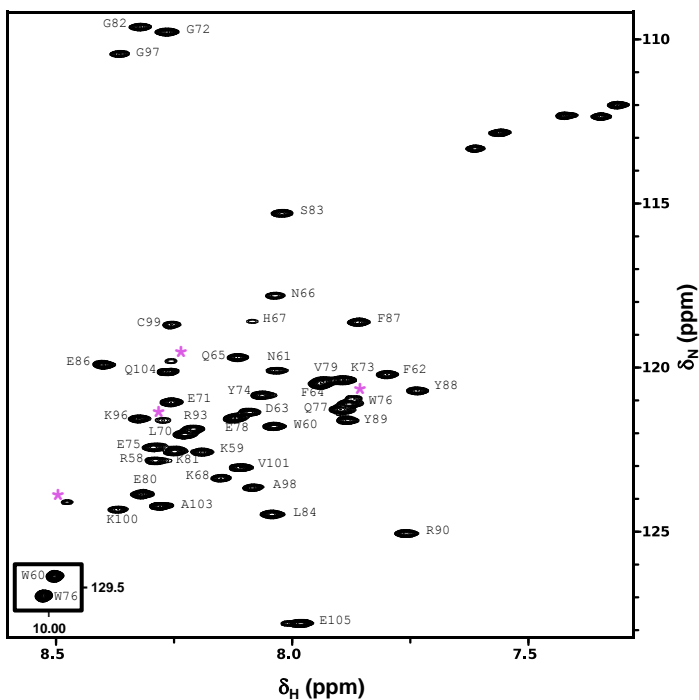

**Supplementary Figure 12. (a)** Chemical features of molecules in the two fragment libraries used to screen for binding to p27-KID. Features of the Maybridge Ro3 library are shown in red and those of the **In-house** fragment library in blue. **(b-e)** Amino acid sequences and 2D  $^1\text{H}$ - $^{15}\text{N}$  HSQC spectra (showing resonance assignments) for p27-KID (**b, c**) and p27-D2 (**d, e**), respectively. Purple asterisk (\*) indicate resonances arising from minor conformers. In (**c**), the regions marked by colored boxes are expanded and shown at a lower contour level in the insets at the right.

**a**

| ID          | Chemical structure                                                                  | Binding Group | AlogP | tPSA  | H-bond acceptor | H-bond donor | MW (Da) |
|-------------|-------------------------------------------------------------------------------------|---------------|-------|-------|-----------------|--------------|---------|
| CC34414     | 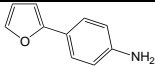   | Group 1       | 2.19  | 35.25 | 2               | 2            | 159.18  |
| SJ000053521 |    | Group 1       | 2.97  | 67.14 | 3               | 2            | 244.24  |
| SJ000483069 |    | Group 1       | 2.76  | 56.21 | 4               | 2            | 264.32  |
| SJ000023358 |    | Group 1       | 3.09  | 46.53 | 3               | 1            | 216.23  |
| SJ000572774 |    | Group 1       | 2.24  | 20.31 | 2               | 0            | 197.23  |
| SJ000248846 |    | Group 1       | 3.17  | 79.45 | 4               | 1            | 264.34  |
| SJ000572486 |   | Group 1       | 2.75  | 49.41 | 4               | 1            | 294.34  |
| SJ000319768 |  | Group 1       | 2.02  | 58.64 | 5               | 1            | 296.32  |
| SJ000208978 |  | Group 2       | 0.07  | 72.08 | 8               | 0            | 291.30  |

**Supplementary Table 1.** Names, chemical structure, Group designation, and chemical parameters for molecules identified as “hits” in the initial fragment library screen (**a**), in the follow-up screen of chemically similar compounds in the same libraries (**b**), and from the in-house high-throughput screening library identified on the basis of the field alignment models (**c**).

**b**

| ID          | Chemical structure                                                                  | Binding mode | AlogP | tPSA  | H-bond acceptor | H-bond donor | MW (Da) |
|-------------|-------------------------------------------------------------------------------------|--------------|-------|-------|-----------------|--------------|---------|
| SJ000572513 | 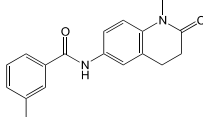   | Group 1      | 2.75  | 49.41 | 4               | 1            | 294.34  |
| SJ000572710 |    | Group 1      | 2.77  | 55.76 | 4               | 1            | 260.28  |
| SJ000319843 |    | Group 1      | 2.15  | 58.64 | 5               | 1            | 296.32  |
| SJ000319683 |    | Group 1      | 1.67  | 58.64 | 5               | 1            | 282.29  |
| SJ000572487 |    | Group 1      | 2.33  | 58.64 | 5               | 1            | 296.32  |
| SJ000572443 |    | Group 1      | 2.15  | 55.56 | 4               | 2            | 254.28  |
| SJ000572401 |   | Group 2      | 1.1   | 62.85 | 7               | 0            | 287.31  |
| SJ000572403 |  | Group 2      | 0.83  | 62.85 | 7               | 0            | 275.30  |
| SJ000572405 |  | Group 2      | 1.35  | 62.85 | 7               | 0            | 289.33  |
| SJ000572407 |  | Group 2      | 0.83  | 62.85 | 7               | 0            | 275.30  |
| SJ000572409 |  | Group 2      | 1.1   | 62.85 | 7               | 0            | 287.31  |
| SJ000572542 |  | Group 2      | 0.92  | 62.85 | 7               | 0            | 275.30  |
| SJ000852806 |  | Group 2      | 2.08  | 62.85 | 7               | 0            | 317.39  |
| SJ000271822 |  | Group 2      | 0.285 | 71.06 | 7               | 0            | 248.24  |

**Supplementary Table 1 (continued)**

C

| ID          | Chemical structure                                                                  | Binding Group | AlogP | tPSA  | H-bond acceptor | H-bond donor | MW (Da) |
|-------------|-------------------------------------------------------------------------------------|---------------|-------|-------|-----------------|--------------|---------|
| SJ000017408 | 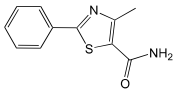   | Group 1       | 1.79  | 84.22 | 3               | 2            | 218.27  |
| SJ000023360 |    | Group 1       | 3.05  | 83.72 | 3               | 0            | 221.3   |
| SJ000023362 |    | Group 1       | 3.664 | 83.72 | 3               | 0            | 247.34  |
| SJ000024853 |    | Group 1       | 2.76  | 72.83 | 5               | 1            | 276.28  |
| SJ000034522 |    | Group 1       | 2.623 | 90.69 | 8               | 2            | 298.24  |
| SJ000039342 |    | Group 1       | 2.63  | 71.84 | 7               | 0            | 355.39  |
| SJ000039843 |   | Group 1       | 3.01  | 127.1 | 6               | 0            | 355.4   |
| SJ000045744 |  | Group 1       | 2.94  | 56.33 | 4               | 2            | 306.36  |
| SJ000013100 |  | Group 2       | 2.02  | 44.12 | 4               | 0            | 214.22  |
| SJ000082958 |  | Group 2       | 2.69  | 88.32 | 7               | 1            | 362.38  |
| SJ000572844 |  | Group 2       | 0.97  | 62.74 | 6               | 0            | 247.25  |
| SJ000852808 |  | Group 2       | 1.317 | 66.09 | 8               | 0            | 346.43  |

Supplementary Table 1 (continued)
